# Supplementary material for: Fractalkine/CX3CL1 induced intercellular adhesion molecule-1-dependent tumor metastasis through the CX3CR1/PI3K/Akt/NF-κB pathway in human osteosarcoma
Source: PubMed Central journal article supplement (PMC5589568; doi:10.18632/oncotarget.11250), 2016-08-12
Supplement: oncotarget-08-54136-s001.pdf [file oncotarget-08-54136-s001.pdf]

## Fractalkine/CX3CL1 induced intercellular adhesion molecule-1-dependent tumor metastasis through the CX3CR1/PI3K/Akt/NF- $\kappa$ B pathway in human osteosarcoma

### SUPPLEMENTARY FIGURE

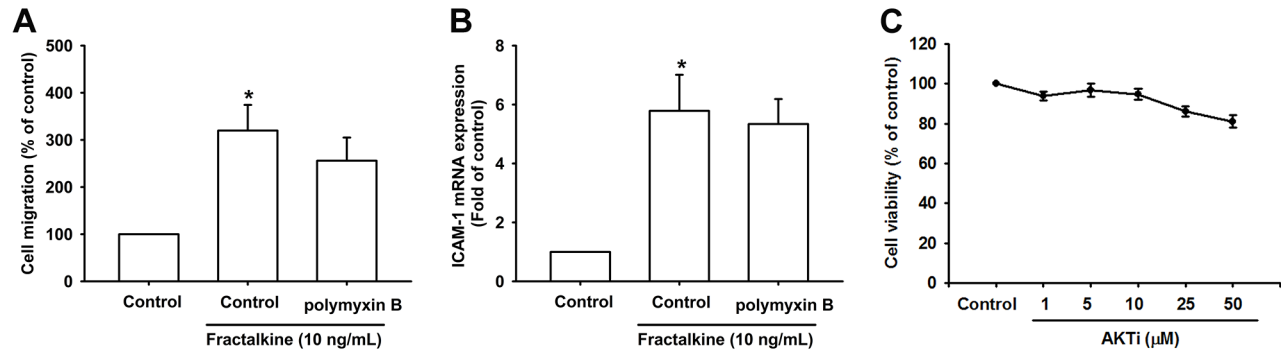

**Supplementary Figure S1: A-B.** MG63 cells were pretreated with polymyxin B (poly B, 1  $\mu$ M) for 30 min followed by stimulation with fractalkine (10 ng/ml), the cell migration and ICAM-1 expression were examined by the Transwell migration assay and qPCR. **C.** MG63 cells were incubated with serial concentrations of AKTi (0-50  $\mu$ M) for 48h, and cell viability was examined using an MTT assay. Results are expressed as the mean  $\pm$  SEM of triplicate samples. \*P < 0.05 compared with the control group.
